# Supplementary material
Source: Springer Nature journal article supplement (https://www.springermedizin.de/resource/supplementary/12968_2008_44_MOESM4_ESM.pdf/9577854)

rest

low dose

max

scar

ED

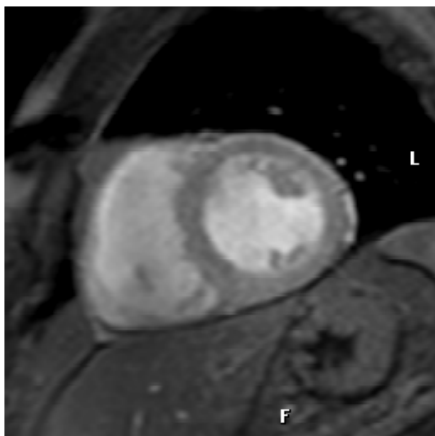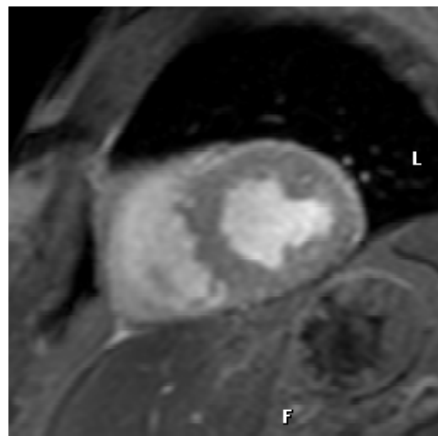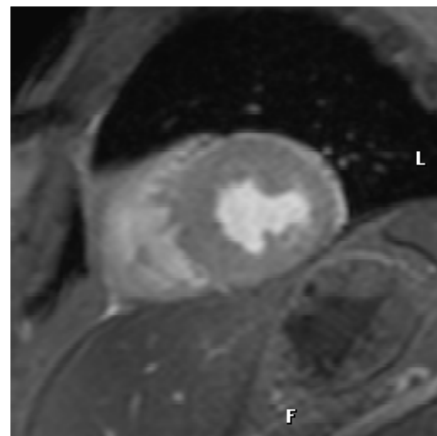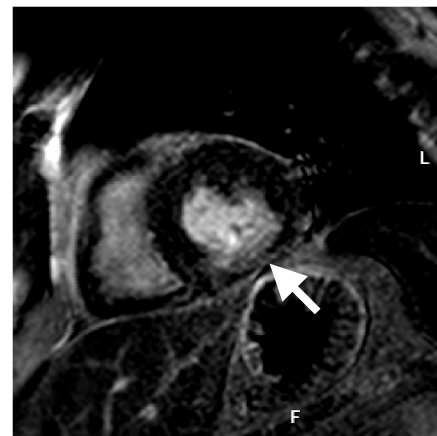

ES

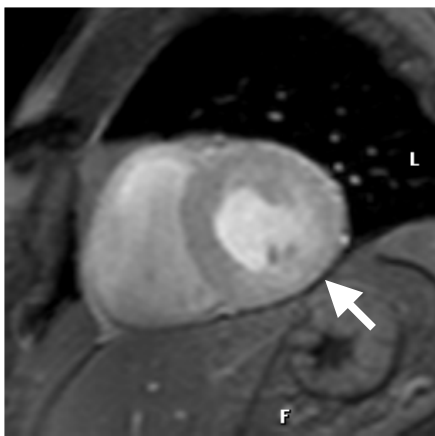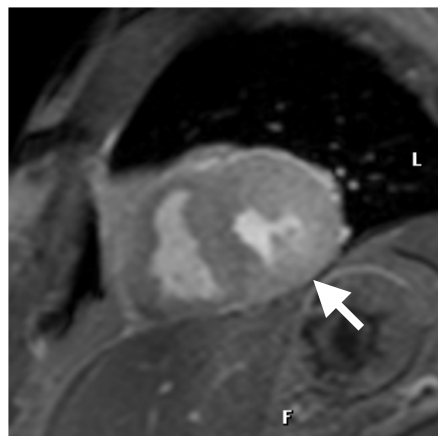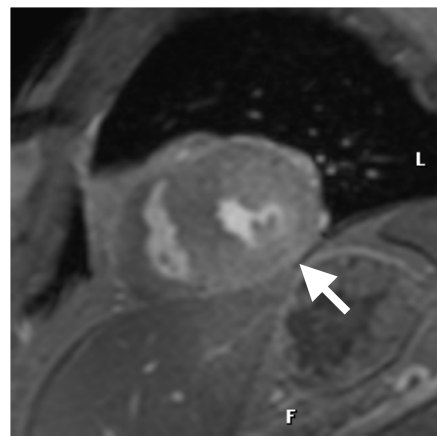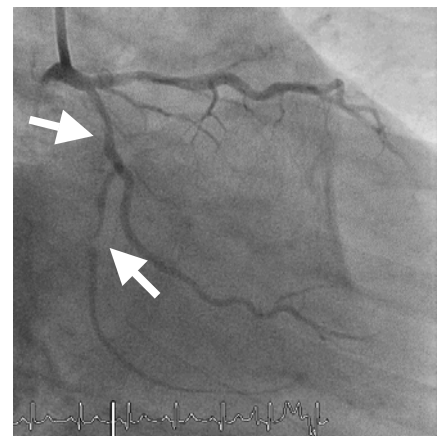

catheter

Supplement: MOESM4 [file 9577854]
